# Supplementary material for: Genomic insights into Indian wheat stripe rust pathotypes from long-read hybrid assemblies
Source: Research Square preprint supplement (doi:10.21203/rs.3.rs-7535284/v1), 2025-10-07
Supplement: Supplementary file 1 [file 4ddf83d87836100f308dc01d.docx]

**Supplementary Information**

**Genomic insights into Indian wheat stripe rust pathotypes from long-read hybrid assemblies**

Anurag Saharan1, Deepak Singla1, Ramesh Gutha2,5, Om Prakash Gangwar3, Manoj Chaudhary4, Jaspal Kaur2, Satinder Kaur1, Inderjit Singh Yadav1 and Parveen Chhuneja1#

1School of Agricultural Biotechnology, Punjab Agricultural University, Ludhiana, India

2Department of Plant Breeding and Genetics, Punjab Agricultural University, Ludhiana, India

3IIWBR Regional Research Station, Flowerdale, Shimla, India

4National Research Institute for Integrated Pest Management, New Delhi, India

5Present address: KVK, NDRI-ERS, Kalyani, West Bengal, India

#Corresponding Author Email: [pchhuneja@pau.edu](mailto:pchhuneja@pau.edu): orcid ID: 0000-0002-8599-9479

**Supplementary Table S1.** Avirulence/virulence structure of different *Pst* pathotypes used in the present study

| Pathotype | Avirulence | virulence |
| --- | --- | --- |
| 110S119 | *Yr1, Yr5, Yr10, Yr15, Yr16, Yr24/Yr26, Yr32, YrSP, Riebesel 147/51(Yr2,9)* | *Yr2, Yr3a, Yr3b, Yr4a, Yr4b, Yr6, Yr7, Yr8, Yr9, Yr11, Yr12, Yr14, Yr17, Yr18, Yr19, Yr22, Yr23, Yr25, Yr27, Yr29, Yr31, YrSK, YrSD, YrSU, Yr70* |
| 238S119 | *Yr1, Yr5, Yr10, Yr14, Yr16, Yr15, Yr24/Yr26, Yr32, YrSP* | *Yr2, Yr3, Yr3a, Yr3b, Yr4a, Yr4b, Yr6, Yr7, Yr8, Yr9, Yr11, Yr12, Yr17, Yr18, Yr19, Yr21, Yr22, Yr23, Yr25, Yr27, Yr29, Yr3, YrSK, YrSD, YrSU, Riebesel 147/51(Yr2,9), Yr70* |
| 46S119 | *Yr1, Yr5, Yr10, Yr14, Yr15, Yr16, Yr24/Yr26, Yr27, Yr32, Yr57, YrSP, YrSU, Riebesel 147/51(Yr2,9,+)* | *Yr2, Yr3a, Yr3b, Yr4a, Yr4b, Yr6, Yr7, Yr8, Yr9, Yr11, Yr12, Yr17, Yr18, Yr19, Yr21, Yr22, Yr23, Yr25, Yr29, Yr31, Yr35, Yr49, Yr51, Yr70, YrA, YrSK, YrSD* |
| 110S84 | *Yr1, Yr3b, Yr4, Yr4b, Yr5, Yr10, Yr11, Yr14, Yr15, Yr16, Yr17, Yr18, Yr24/26, Yr25, Yr29, Yr32, YrA, YrSP, Riebesel 147/51(Yr2,9)* | *Yr2, Yr3, Yr3a, Yr4a, Yr6, Yr7, Yr8, Yr9, Yr12, Yr19, Yr22, Yr23, Yr27, Yr31, YrSK, YrSD, YrSU* |
| 78S84 | *Yr1, Yr3b, Yr4b, Yr5, Yr10, Yr11, Yr14, Yr15, Yr16, Yr17, Yr18, Yr24/26, Yr25, Yr28, Yr29, Yr32, YrA, YrSD, YrSP, Riebesel 147/51(Yr2,9,+)* | *Yr2, Yr3, Yr3a, Yr4a, Yr6, Yr7, Yr8, Yr9, Yr12, Yr19, Yr22, Yr23, Yr27, Yr31, YrSK, YrSU* |

**Supplementary** Table S2 Glycosyl transferase (GT), Glycoside hydrolyase (GH), auxiliary activities (AAs), based on CAZy database in five *Pst* pathotypes

| CAZy Subfamily | *Pst* Pathotypes | | | | |
| --- | --- | --- | --- | --- | --- |
| 110S119 | 238S119 | 46S119 | 110S84 | 78S84 |
| Glycosyl transferase (GT) | | | | | |
| [GT1](http://www.cazy.org/GT1.html) | 3 | 2 | 3 | 3 | 4 |
| [GT2_Chitin_synth](http://www.cazy.org/GT2_Chitin_synth.html) | 8 | 10 | 9 | 9 | 10 |
| [GT5](http://www.cazy.org/GT5.html) | 2 | 2 | 2 | 2 | 2 |
| [GT3](http://www.cazy.org/GT3.html) | 1 | 1 | 2 | 1 | 1 |
| [GT4](http://www.cazy.org/GT4.html) | 4 | 4 | 3 | 2 | 3 |
| [GT8](http://www.cazy.org/GT8.html) | 1 | 2 | 2 | 1 | 1 |
| [GT10](http://www.cazy.org/GT10.html) | 3 | 2 | 2 | 2 | 2 |
| [GT15](http://www.cazy.org/GT15.html) | 0 | 0 | 0 | 1 | 1 |
| [GT20](http://www.cazy.org/GT20.html) | 5 | 4 | 5 | 2 | 2 |
| [GT21](http://www.cazy.org/GT21.html) | 2 | 2 | 1 | 2 | 1 |
| [GT22](http://www.cazy.org/GT22.html) | 4 | 3 | 4 | 4 | 4 |
| [GT24](http://www.cazy.org/GT24.html) | 1 | 1 | 1 | 1 | 1 |
| [GT25](http://www.cazy.org/GT25.html) | 3 | 3 | 3 | 3 | 3 |
| [GT31](http://www.cazy.org/GT31.html) | 2 | 2 | 2 | 2 | 2 |
| [GT32](http://www.cazy.org/GT32.html) | 1 | 2 | 2 | 2 | 2 |
| [GT33](http://www.cazy.org/GT33.html) | 2 | 1 | 1 | 1 | 2 |
| [GT39](http://www.cazy.org/GT39.html) | 3 | 3 | 3 | 3 | 3 |
| [GT43](http://www.cazy.org/GT43.html) | 4 | 2 | 1 | 2 | 2 |
| [GT48](http://www.cazy.org/GT48.html) | 2 | 2 | 1 | 1 | 1 |
| [GT49](http://www.cazy.org/GT49.html) | 1 | 1 | 1 | 1 | 1 |
| [GT50](http://www.cazy.org/GT50.html) | 2 | 2 | 2 | 3 | 3 |
| [GT57](http://www.cazy.org/GT57.html) | 2 | 2 | 2 | 2 | 3 |
| [GT58](http://www.cazy.org/GT58.html) | 1 | 1 | 1 | 1 | 1 |
| [GT59](http://www.cazy.org/GT59.html) | 1 | 1 | 1 | 2 | 2 |
| [GT69](http://www.cazy.org/GT69.html) | 3 | 4 | 4 | 5 | 5 |
| [GT66](http://www.cazy.org/GT66.html) | 1 | 0 | 1 | 2 | 1 |
| [GT71](http://www.cazy.org/GT71.html) | 2 | 2 | 2 | 1 | 1 |
| [GT76](http://www.cazy.org/GT76.html) | 1 | 1 | 1 | 1 | 1 |
| [GT90](http://www.cazy.org/GT90.html) | 7 | 7 | 8 | 8 | 9 |
| Glycoside hydrolyase (GH) | | | | | |
| [GH2](http://www.cazy.org/GH2.html) | 4 | 4 | 4 | 5 | 4 |
| [GH3](http://www.cazy.org/GH3.html) | 2 | 2 | 2 | 2 | 2 |
| [GH5](http://www.cazy.org/GH5.html) | 41 | 35 | 40 | 41 | 40 |
| [GH7](http://www.cazy.org/GH7.html) | 9 | 8 | 7 | 8 | 7 |
| [GH10](http://www.cazy.org/GH10.html) | 4 | 5 | 4 | 4 | 4 |
| [GH12](http://www.cazy.org/GH12.html) | 2 | 2 | 1 | 3 | 4 |
| [GH13](http://www.cazy.org/GH13.html) | 5 | 5 | 5 | 5 | 6 |
| [GH15](http://www.cazy.org/GH15.html) | 5 | 4 | 4 | 3 | 3 |
| [GH16](http://www.cazy.org/GH16.html) | 7 | 8 | 9 | 9 | 9 |
| [GH17](http://www.cazy.org/GH17.html) | 2 | 2 | 2 | 2 | 2 |
| [GH18](http://www.cazy.org/GH18.html) | 13 | 14 | 13 | 16 | 18 |
| [GH20](http://www.cazy.org/GH20.html) | 1 | 2 | 1 | 1 | 1 |
| [GH26](http://www.cazy.org/GH26.html) | 5 | 5 | 5 | 5 | 5 |
| [GH28](http://www.cazy.org/GH28.html) | 1 | 1 | 2 | 1 | 1 |
| [GH31](http://www.cazy.org/GH31.html) | 6 | 3 | 3 | 4 | 3 |
| [GH32](http://www.cazy.org/GH32.html) | 2 | 1 | 2 | 2 | 2 |
| [GH35](http://www.cazy.org/GH35.html) | 1 | 1 | 1 | 1 | 1 |
| [GH37](http://www.cazy.org/GH37.html) | 3 | 3 | 1 | 2 | 2 |
| [GH38](http://www.cazy.org/GH38.html) | 1 | 2 | 2 | 2 | 2 |
| [GH43](http://www.cazy.org/GH43.html) | 3 | 3 | 3 | 3 | 3 |
| [GH47](http://www.cazy.org/GH47.html) | 19 | 19 | 12 | 15 | 17 |
| [GH63](http://www.cazy.org/GH63.html) | 1 | 2 | 1 | 1 | 1 |
| [GH65](http://www.cazy.org/GH65.html) | 2 | 2 | 1 | 2 | 3 |
| [GH71](http://www.cazy.org/GH71.html) | 4 | 3 | 6 | 6 | 6 |
| [GH72](http://www.cazy.org/GH72.html) | 1 | 1 | 1 | 1 | 1 |
| [GH76](http://www.cazy.org/GH76.html) | 4 | 3 | 4 | 3 | 3 |
| [GH79](http://www.cazy.org/GH79.html) | 4 | 4 | 5 | 4 | 4 |
| [GH81](http://www.cazy.org/GH81.html) | 1 | 1 | 1 | 1 | 1 |
| [GH85](http://www.cazy.org/GH85.html) | 1 | 1 | 1 | 1 | 1 |
| [GH105](http://www.cazy.org/GH105.html) | 3 | 4 | 3 | 1 | 3 |
| [GH125](http://www.cazy.org/GH125.html) | 1 | 1 | 1 | 1 | 1 |
| [GH131](http://www.cazy.org/GH131.html) | 7 | 6 | 5 | 5 | 6 |
| [GH133](http://www.cazy.org/GH133.html) | 1 | 1 | 1 | 1 | 1 |
| [GH152](http://www.cazy.org/GH152.html) | 4 | 4 | 4 | 5 | 5 |
| Auxiliary activities (AAs), Carbohydrate Esterase (CE), polysaccharide lyases (PLs) and carbohydrate-binding modules | | | | | |
| [AA1](http://www.cazy.org/AA1.html) | 10 | 11 | 7 | 10 | 9 |
| [AA2](http://www.cazy.org/AA2.html) | 2 | 3 | 2 | 2 | 2 |
| [AA3](http://www.cazy.org/AA3.html) | 12 | 12 | 12 | 12 | 17 |
| [AA4](http://www.cazy.org/AA4.html) | 4 | 2 | 3 | 2 | 2 |
| [AA5](http://www.cazy.org/AA5.html) | 10 | 8 | 7 | 7 | 8 |
| [AA6](http://www.cazy.org/AA6.html) | 1 | 1 | 1 | 1 | 1 |
| [AA7](http://www.cazy.org/AA7.html) | 4 | 4 | 4 | 5 | 6 |
| [AA9](http://www.cazy.org/AA9.html) | 3 | 3 | 3 | 3 | 3 |
| [AA16](http://www.cazy.org/AA16.html) | 1 | 0 | 0 | 0 | 0 |
| [CE4](http://www.cazy.org/CE4.html) | 15 | 20 | 19 | 20 | 19 |
| [CE5](http://www.cazy.org/CE5.html) | 10 | 10 | 10 | 10 | 10 |
| [CE8](http://www.cazy.org/CE8.html) | 7 | 2 | 4 | 6 | 7 |
| [CE10](http://www.cazy.org/CE10.html) | 10 | 9 | 9 | 8 | 9 |
| [CE16](http://www.cazy.org/CE16.html) | 5 | 5 | 5 | 5 | 6 |
| [CBM21](http://www.cazy.org/CBM21.html) | 1 | 1 | 1 | 1 | 1 |
| [PL1](http://www.cazy.org/PL1.html) | 1 | 2 | 2 | 2 | 2 |
| [PL35](http://www.cazy.org/PL35.html) | 1 | 1 | 1 | 1 | 1 |

**Supplementary figures**


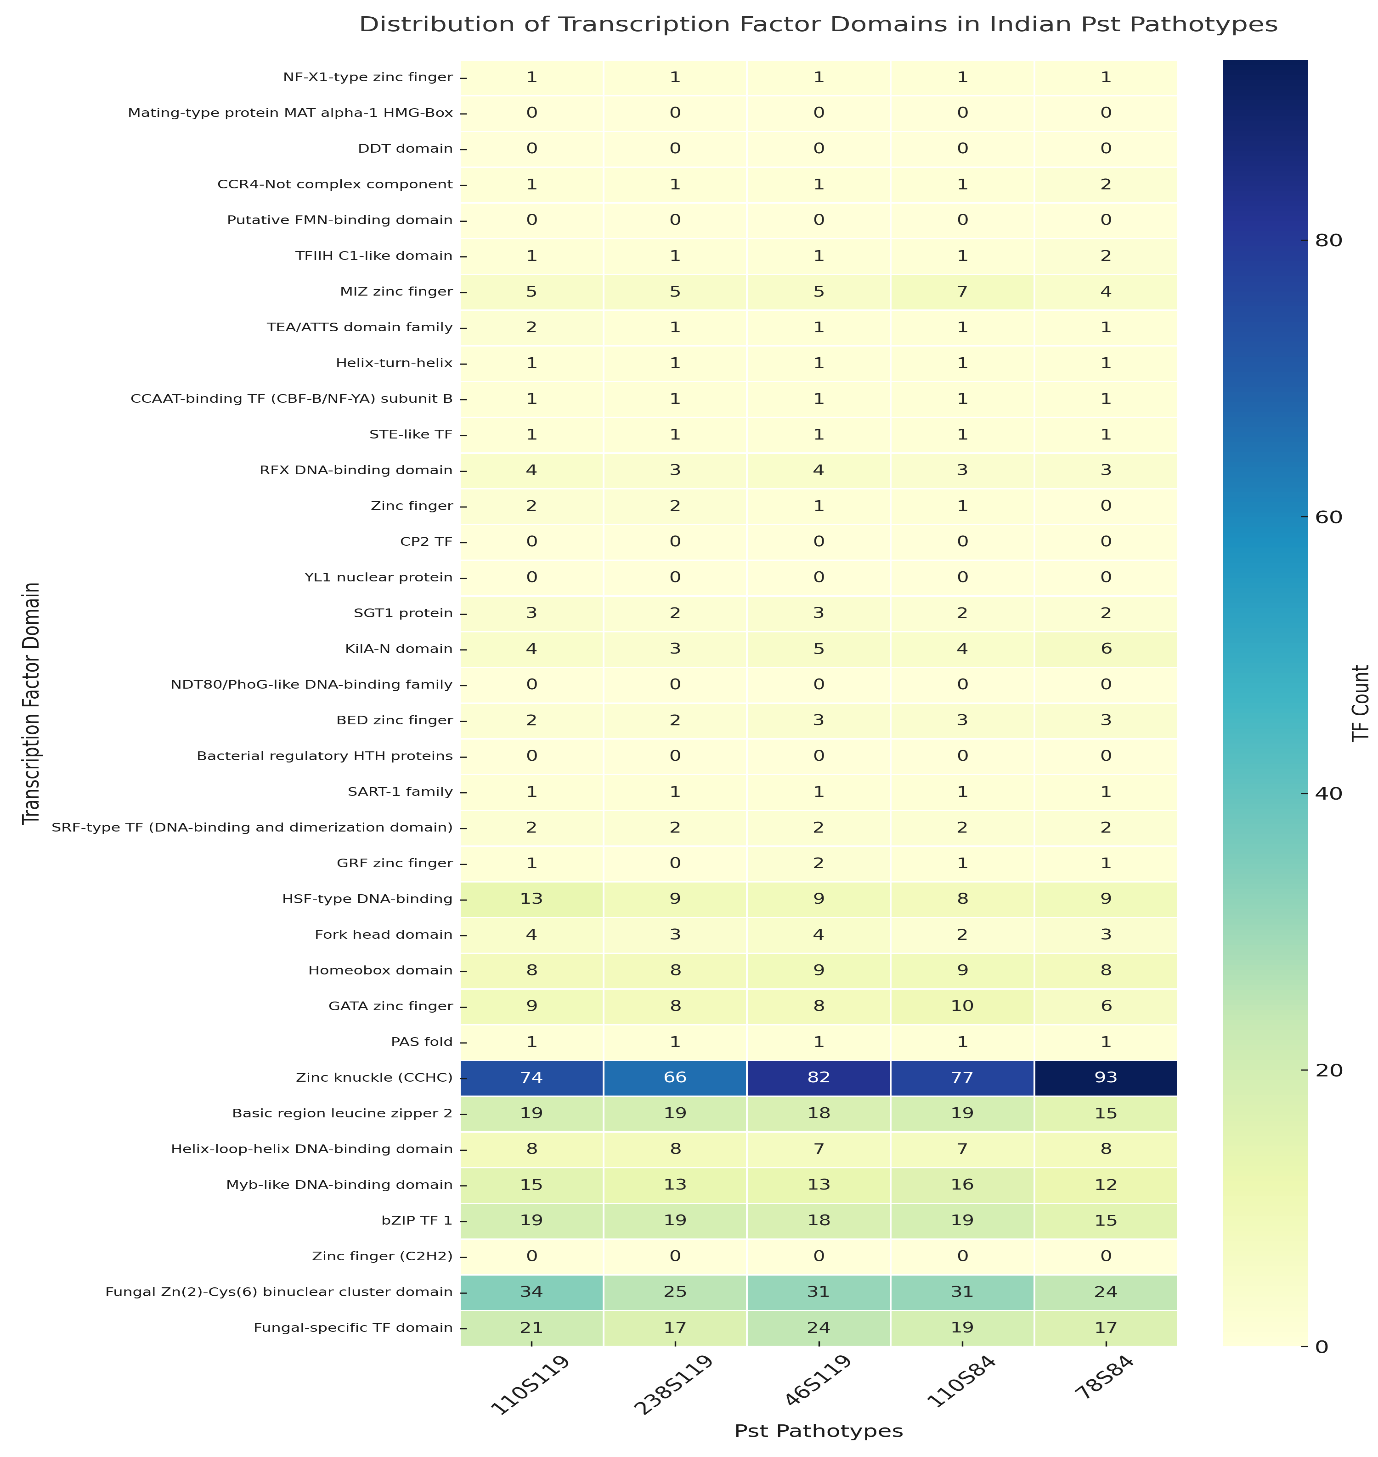


**Fig. S1 Heatmap showing the distribution of InterProScan-identified transcription factor (TF) domains across five Indian** Puccinia striiformis **pathotypes.**
The heatmap illustrates the abundance of 36 TF-related InterPro domains in pathotypes PST_110S119, PST_238S119, PST_46S119, PST_110S84, and PST_78S84. Darker shades indicate higher representation of specific domains. Key TF families such as zinc finger (e.g., CCHC, RING, BED), homeobox, helix-loop-helix, basic leucine zipper (bZIP), and fungal Zn(2)-Cys(6) binuclear clusters are observed.

**
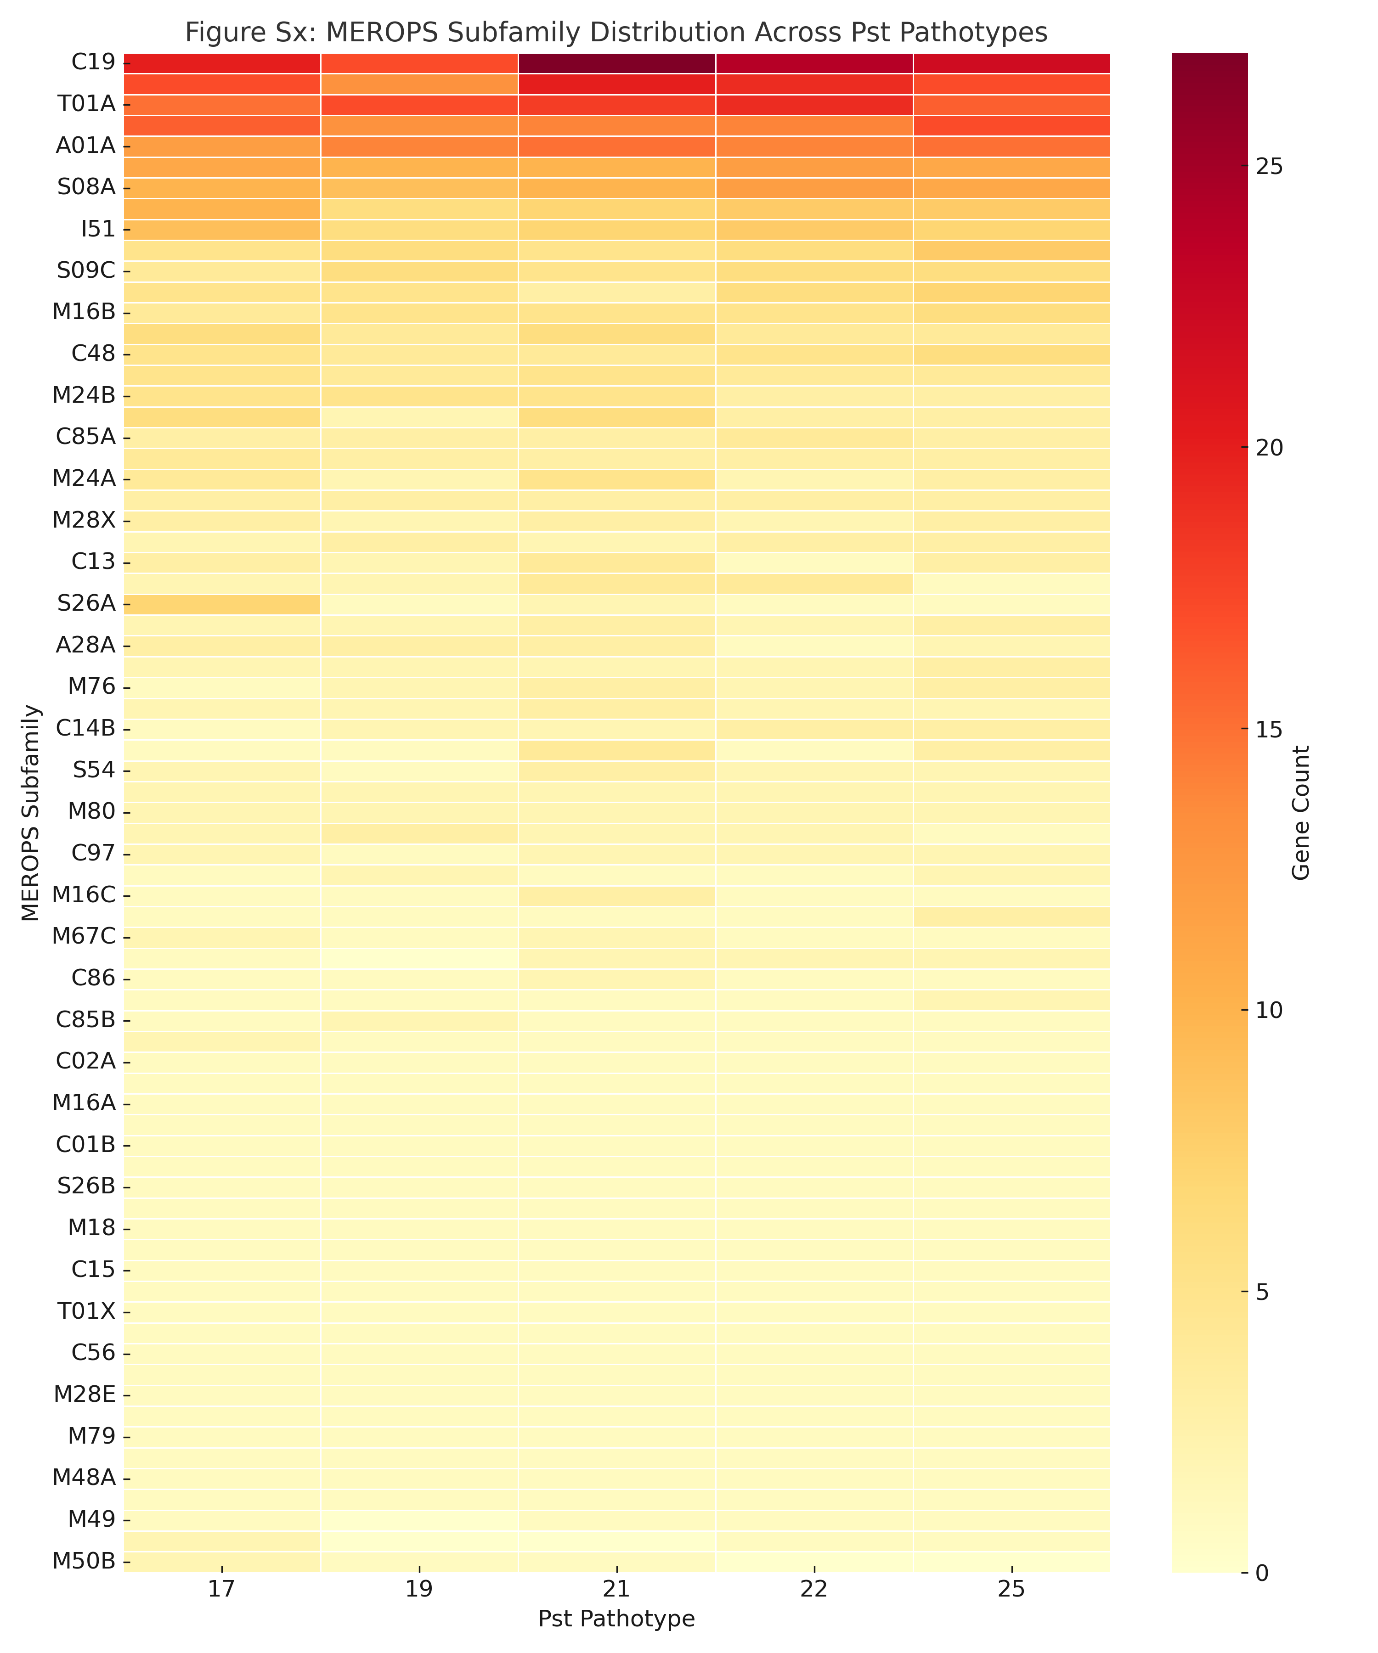
**

**Fig. S2.** Heatmap showing the distribution of MEROPS subfamilies in five Puccinia striiformis pathotypes. Rows represent MEROPS subfamilies, while columns represent the pathotypes. Color intensity reflects the count of genes per subfamily in each pathotype, highlighting variation in peptidase family representation across strains.
